# Supplementary material for: Exploring Extracts from Wendlandia Uvariifolia Subsp. Chinensis (Merr.) Cowan as Natural PDE5 Inhibitors with Potent Anti-Erectile Dysfunction Activity
Source: Research Square preprint supplement (doi:10.21203/rs.3.rs-8582162/v1), 2026-01-27
Supplement: Supplementary file 1 [file 4a952869e731c31010d60e23.docx]

# Supporting Information for

**Exploring Extracts from *Wendlandia Uvariifolia* Subsp. *Chinensis* (Merr.) Cowan as Natural PDE5 Inhibitors with Potent Anti-****Erectile Dysfunction Activity**

Wenhui Gu1, #, Lingyu Wu1, #, Zhiguo Yang1, 2, #, Zhongbin Cheng1, Wenwen Liu1, Yi-You Huang1, Dan Liu2, Faliang An3, Jian Li1, 3, 4, Qian Zhou1, *, Baoli Li1, *, and Hai-Bin Luo1,5

1 Key Laboratory of Tropical Biological Resources of Ministry of Education and Hainan Engineering Research Center for Drug Screening and Evaluation, School of Pharmaceutical Sciences, Hainan University, Haikou 570228, China

2 Key Laboratory of Structure-Based Drugs Design & Discovery of Ministry of Education, Shenyang Pharmaceutical University, Shenyang 110016, China

3 State Key Laboratory of Bioreactor Engineering, Shanghai Frontiers Science Center of Optogenetic Techniques for Cell Metabolism, Frontiers Science Center for Materiobiology and Dynamic Chemistry, Shanghai Key Laboratory of New Drug Design, School of Pharmacy, East China University of Science and Technology, Shanghai 200237, China

4 Key Laboratory of Xinjiang Phytomedicine Resource and Utilization, Ministry of Education, School of Pharmacy, Shihezi University, Shihezi 832003, China

5 Song Li’ Academician Workstation of Hainan University (School of Pharmaceutical Sciences), Yazhou Bay, Sanya, 572000, China.

# These authors contributed equally to this work.

Corresponding authors.

Email addresses: zhouqian@hainanu.edu.cn (Qian Zhou), baolili@hainanu.edu.cn (Baoli Li).

**Table of Contents**

| **S1.** Identification of *W. u. Chinensis*  **S2.** Identification of major chemical constituents in PE by GC-MS  **S3.** Acute toxicity experiment ofPE in rats  **S4.** DMED model  **Table S1.** Structures of major chemical constituents in PE  **Fig. S1** Reference diagrams for 4-8 and 10-11 standards. |  |  |  | 3  4  6  7 |
| --- | --- | --- | --- | --- |

**S1.** Identification of *W. u. Chinensis*

After extracting total DNA from the leaves of the branch sections at the bud stage of the submitted sample, PCR amplification and bidirectional sequencing were performed based on the ITS sequence fragment. After sequence splicing, the ITS sequence is as follows.

**ACTGCGGAAGGATCATTGTCGAATCCTGCAAAGCAGACGACCGCGAACCCGTGTAACCGCCGGGCGTCGGGGAGGGGGCGGCGAGACTAAACCCTCCCRTTCCTTCMCCGTCGCTCCCCGTGCCTCAYGGCGCGGACCAATAACTCAACCCCGGCGCGGAAAGCGCCAAGGAAAACTCAAAAGGATCGCCCGGCCCCCGACTGCCCCGTCCGCGGAGCGCAGGAGGGGATGCCGCGGCGTCTGTCGTAACCAAAACGACTCTCGGCAACGGATATCTCGGCTCTCGCATCGATGAAGAACGTAGCGAAATGCGATACTTGGTGTGAATTGCAGAATCCCGTGAACCATCGAGTTTTTGAACGCAAGTTGCGCCCGAAGCCATTAGGCCGAGGGCACGTCTGCCTGGGCGTCACGCATCGCGTCGCCACCCCCACCTCGTGCGGGGCGGCGGAGAGTGGCCTCCCGTGCCTCAGGGCGCGGCCGGCCTAAATGCGAGTCCTCGGCGAGGGACGTCACGACTAGTGGTGGTTGAATACCTCAATCGAGTCCTTGTCGTGCCGGCAACCCCCGCCGTTGTTCGGGCTCCCACGACCCTCAAAGCTCGCGTCTCGACTCGAGCCTCGACCGCGACCCCAGGTCAGGCGGGATTACCCGCTGAGTTTAAGCATATC**

The obtained partial ITS sequence was compared by NCBI Nucleotide BLAST sequence alignment, and a phylogenetic tree was constructed by the fast algorithm of minimum evolution method (Fast Minimum Evolution). Combined with the morphological characteristics shown by the branch sections at the bud stage of the submitted sample, the submitted sample was identified as: *Wendlandia uvariifolia subsp. chinensis.*

**S2.** Identification of major chemical constituents in PE by GC-MS

**Table S1.** Structures of major chemical constituents in PE

| Compd. | tR/min | Formula | Inferred Compounds | Chemical Structure |
| --- | --- | --- | --- | --- |
| **1** | 23.258 | C20H38 | 7,11,15-trimethyl-3-methylidene-hexadec-1-ene |  |
| **2** | 23.333 | C20H40 | 2-hexadecene, 3,7,11,15-tetramethyl |  |
| **3** | 23.574 | C20H38O2 | oleyl acetate |  |
| **4** | 24.608 | C18H28O3 | methyl 3-(3,5-di-tert-butyl-4-hydroxyphenyl) propionate |  |
| **5** | 24.827 | C16H22O4 | dibutyl terephthalate |  |
| **6** | 25.160 | C18H36O2 | palmitic acid ethyl ester |  |
| **7** | 26.603 | C20H40O | phytol |  |
| **8** | 26.800 | C18H32O2 | linoleic acid |  |
| **9** | 26.878 | C18H30O2 | α-linolenic acid |  |
| **10** | 27.110 | C18H36O2 | stearic acid |  |
| **11** | 27.211 | C20H34O2 | linolenic acid ethyl ester |  |
| **12** | 27.241 | C20H40O2 | ethyl stearate |  |

*
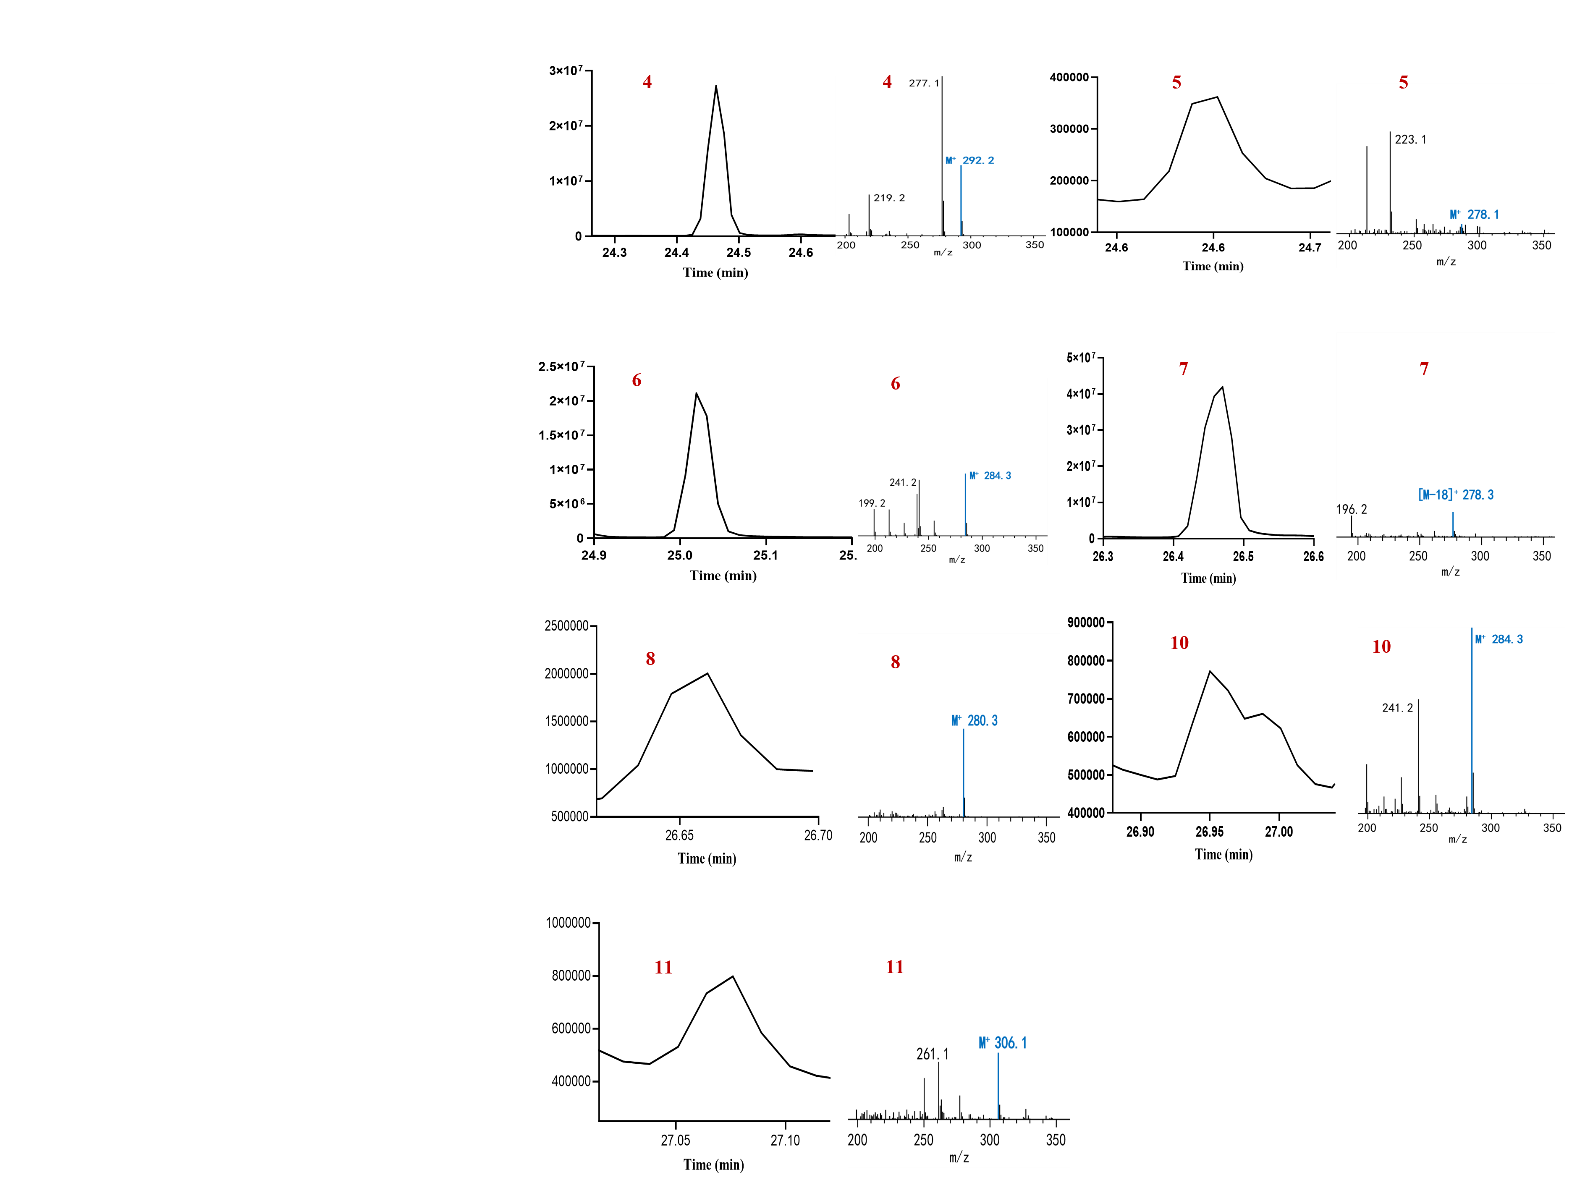
*

**Fig. S1** Reference diagrams for 4-8 and 10-11 standards.

**S3.** Acute toxicity experiment ofPE in rats

**Fig. S2** Weight changes in rats during the acute toxicity experiment**.**

**S4.** DMED model

To further confirm the anti-ED efficacy of PE, a DMED model was established. Before STZ injection, there were no significant differences in initial body weight, blood glucose levels, general appearance, or behavioral activity among the experimental groups. Following diabetes induction, the DMED group exhibited a significant reduction in body weight and a marked increase in blood glucose levels compared to the control group (Figure S3A-B).


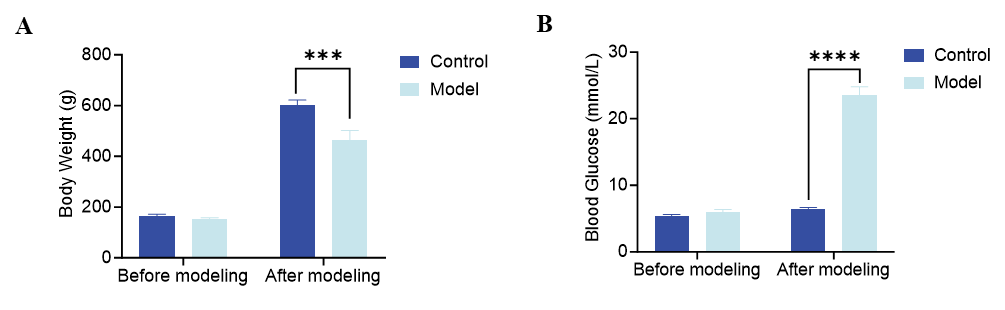


**Fig. S3** (A-B) Changes in body weight and blood glucose levels before and after modeling. n = 8 independent experiments and data are presented as means ± SEM. *0.01 < p < 0.05, **0.001 < p < 0.01, ***p < 0.001, and ****p < 0.001.
