# Supplementary material for: Exploring Extracts from Wendlandia Uvariifolia Subsp. Chinensis (Merr.) Cowan as Natural PDE5 Inhibitors with Potent Anti-Erectile Dysfunction Activity
Source: Research Square preprint supplement (doi:10.21203/rs.3.rs-8582162/v1), 2026-01-27
Supplement: Supplementary file 2 [file d863340f89b94355aa87ce33.docx]

Summary of table of experimental reagent information

| **No.** | **Name** | **Supplier** | **Country** | **Catalogue Numbers** | **Dose/Dilution** | **Host Species** |
| --- | --- | --- | --- | --- | --- | --- |
| 1 | Paroxetine | Macklin Biochemical Technology Co., Ltd. | China | B873253 | 10 mg/kg |  |
| 2 | Sildenafil | Adamas Reagent Co., Ltd. | China | R286565 | 5 mg/kg |  |
| 3 | Ethanol | Adamas Reagent Co., Ltd. | China | A040901 |  |  |
| 4 | Petroleum ether | Adamas Reagent Co., Ltd. | China | D070281 |  |  |
| 5 | Ethyl acetate | Adamas Reagent Co., Ltd. | China | A022002 |  |  |
| 6 | Dimethyl sulfoxide | Titan Scientific Co., Ltd. | China | G75927B |  |  |
| 7 | Tween 20 | Titan Scientific Co., Ltd. | China | G89190B |  |  |
| 8 | PEG 300 | Yuanye Bio-Technology Co., Ltd. | China | CP8187 |  |  |
| 9 | Human Umbilical Vein Endothelial Cells | Shanghai Meiyan Biological Technology Co., Ltd. | China | CC-Y1285 |  |  |
| 10 | DMED | HyClone | USA | 10566-016 |  |  |
| 11 | Fetal bovine serum | Gibco, Thermo Fisher Scientific | USA | A5256701 | 10% |  |
| 12 | Penicillin/streptomycin | Servicebio | China | G4014-100ML | 1% |  |
| 13 | CCK8 | TargetMol | China | C0005 | 10 µL/test |  |
| 14 | Zoletil 50 | Virbac | France | H001 | 50 mg/kg |  |
| 15 | 4% paraformaldehyde | Servicebio | China | BL539A |  |  |
| 16 | HEPES | Servicebio | China | G4210 | 1 ml/test |  |
| 17 | Testosterone | BYabscience | China | BY-WJZF1224 |  |  |
| 18 | Luteinizing hormone | BYabscience | China | BY-WJZF1591 |  |  |
| 19 | Follicle-stimulating hormone | BYabscience | China | BY-ER334438 |  |  |
| 20 | Adenosine deaminase | BYabscience | China | BY-ER337173 |  |  |
| 21 | NO Test Kit | Beyotime Biotechnology | China | S0021S |  |  |
| 22 | cGMP Test Kit | BYabscience | China | BY-WJZF0408 |  |  |
| 23 | PDE5 Test Kit | BYabscience | China | BY-ER337483 |  |  |
| 24 | Cyclic AMP response element-binding protein | Cell Signaling | USA | 9197T | 1:800 | Human, Mouse, Rat |
| 25 | Streptozotocin | Sigma-Aldrich | USA | 572201 | 35 mg/kg |  |
| 26 | Apomorphine | Aladdin Biochemical Technology Co., Ltd. | China | R2866565 | 100 μg/kg |  |
| 27 | Isoflurane | RWD Life Science Co., Ltd. | China | R510-22-10 |  |  |
| 28 | MgCl2 | Bide Pharmatech Ltd. | China | BD136984 |  |  |
| 29 | Tris | Beyotime Biotechnology | China | ST761 |  |  |
| 30 | DTT | Yeasen Biotechnology Co., Ltd. | China | BD20311ES10 |  |  |
| 31 | ZnSO₄ | Bide Pharmatech Ltd. | China | BD157254 | 200 μL |  |
| 32 | Ba(OH)₂ | Energy Chemical | China | A17300 | 200 μL |  |
